# Supplementary material for: A fracture rarely comes alone: associations of fractures and stylolites in analogue outcrops improve borehole image interpretations of fractured carbonate geothermal reservoirs
Source: Copernicus journal article supplement (doi:10.5194/se-17-113-2026), 2026-01-21
Supplement: Supplementary file 1 [file fig08_fig09_stereonets.xlsx]

## Sheet: Test Locations
Locality Stations	EPSG:4326 - WGS 84
	latitude	longitude
Station 1	45.95	6.25253
Station 2	45.9495	6.25303
Station 3	45.9509	6.25391
Station 4	45.9537	6.25955
Station 5	45.9385	6.2514
Station 6	45.9418	6.24563
Station 7	45.9486	6.24048
Station 8	45.9534	6.24541
Station 9	45.9523	6.2517
Station 10	45.9475	6.24623
Station 11	45.9555	6.25375
Station 12	45.9484	6.25298
Station 13	45.9457	6.25221
Station 14	45.9493	6.25472
Station 15	45.9507	6.25618
Station 16	45.9573	6.26379
Station 17	45.9509	6.24032
Station 18	45.9605	6.23007
Station 22	46.3203	6.03052
Station 26	46.2303	5.87714
Station 28	46.313	5.93502
Station 29	46.2945	6.0165
Station 30	46.3528	6.09767
Station 31	46.1768	5.81556
Station 32	46.1175	5.89587
Station 34	46.0934	6.14073
Station 35	46.0369	5.96024
Station 39	46.101	5.89652

## Sheet: PA1+PA2
E2 Parmelan Unfolded	Mode-II		Slickenside			Hybrid/Mode-III			Stylolite
Station	Strike (RHR)	Dip	Trend	Plunge	Sense of Shear	Strike (RHR)	Dip	Sense of Shear	Strike (RHR)	Dip
Station 1	214	24	303	24	Reverse	320	87	Sin
	76	21			Reverse	346	70	Sin
	212	31			Reverse	309	73	Sin
						293	70	Dex
						303	73	Dex
Station 3						342	86	Sin
						334	85	Sin
						285	81	Dex
						290	81	Dex
Station 4						140	90	Dex	35	90
						153	90	Dex
						147	90	Sin
						151	90	Sin
						126	90	Dex
						160	90	Sin
Station 7	193	19	325	10	Reverse
	31	40	115	38	Reverse
Station 8						169	81	Sin	215	74
						137	90	Dex
Station 9						310	80	Dex	50	86
						332	78	Sin
Station 11	211	30			Reverse
Not backtilted.	69	17			Reverse
Station 12
						300	80	Dex
						298	80	Dex
						313	80	Dex
						320	81	Sin
						321	81	Sin
						338	82	Sin
Station 13
						306	75	Dex	207	88
						306	75	Dex
						310	75	Sin
						318	76	Sin
						311	75	Sin
Station 14						328	84	Sin
						306	81	Dex
						315	82	Dex
Station 15						314	76	Dex
						308	76	Dex
						336	77	Sin
Station 17	40	26	130	29	Rev	298	83	Dex
						315	85	Sin
						327	88	Sin
						312	85	Sin
Station 18	211	25	318	25	Rev
	82	19	140	14	Rev

## Sheet: PA3
E3 Parmelan Unfolded	Mode-II		Slickenside			Hybrid/Mode-III			Stylolite
Station	Strike (RHR)	Dip	Trend	Plunge	Sense of Shear	Strike (RHR)	Dip	Sense of Shear	Strike (RHR)	Dip
Station 2						283	82	Dex	185	87
						260	86	Dex
						309	78	Sin
Station 3						256	82	Dex	23	89
						252	82	Dex
						258	82	Dex
						250	82	Dex
						256	86	Dex
						250	76	Dex
Station 4						286	90	Sin	195	90
						297	88	Sin
						304	90	Sin
						260	90	Dex
						297	90	Dex
						286	90	Dex
						260	88	Dex
						292	90	Dex
						269	89	Dex
Station 5						134	79	Sin
						127	81	Sin
						128	81	Sin
						96	90	Dex
						270	88	Dex
Station 6						255	90	Dex
						252	90	Dex
						250	90	Sin
Station 7						245	75	Dex	332	88
						235	74	Dex
Station 9						59	88	Dex	354	87
						264	87	Dex
						57	88	Dex
						279	84	Sin
						265	86	Sin
Station 10						260	90	Dex
						235	90	Dex
						267	90	Dex
						264	90	Dex
						284	90	Sin
						285	90	Sin
						302	90	Sin
Station 11						66	87	Dex	173	90
						279	81	Sin
Station 12						94	90	Dex	12	90
						128	90	Sin
						128	90	Sin
						118	90	Sin
Station 13						267	75	Dex
						278	74	Dex
						282	74	Sin
Station 14						255	80	Dex	195	88
									210	86
									192	89
Station 15						259	82	Dex	11	82
						302	76	Sin	5	81
						310	75	Sin
Station 16						276	81	Dex
						286	83	Dex
						296	85	Sin

## Sheet: JA1+JA2
Jura/Vuache	Mode-II		Slickenside			Hybrid/Mode-III			Stylolite
Station	Strike (RHR)	Dip	Trend	Plunge	Sense of Shear	Strike (RHR)	Dip	Sense of Shear	Strike (RHR)	Dip
Station 22						112	75	Dex	218	85
						312	83	Dex
						119	88	Sin
						116	90	Sin
Station 26	115	35			Rev	109	70	Dex	222	88
	191	32			Rev	107	68	Dex	59	81
Station 28	14	29	140	24	Rev				55	76
	31	28	148	26	Rev				257	77
	253	29	317	27	Rev
Station 29	57	18	110	42	Rev				56	87
	48	45	131	15	Rev				41	71
	35	0	125	0	Rev
	120	90	118	16	Dex
	100	65			Dex
	341	80			Sin
Station 30	225	15			Rev				50	90
	35	30			Rev				232	82
	287	1	317	4	Rev				54	90
	288	76	108	3	Dex				223	71
	355	85			Sin
	160	68			Sin
	342	90			Sin
Station 31	9	83	190	3	Sin				40	84
									222	81
									36	70
Station 35	219	22	304	20	Rev
	30	26	121	21	Rev
Station 39	50	22			Rev				27	89
	215	30			Rev

## Sheet: JA3+JA4
E3 Jura Unfolded	Mode-II		Slickenside			Hybrid/Mode-III			Stylolite
Station	Strike (RHR)	Dip	Trend	Plunge	Sense of Shear	Strike (RHR)	Dip	Sense of Shear	Strike (RHR)	Dip
						78	81	Dex
Station 26						120	83	Sin	182	74
Station 28	318	81	145	8	Sin				22	81
	317	77	140	16	Sin				196	74
	320	80	139	4	Sin
Station 31	75	85	74	26	Dex				25	87
	74	85			Dex				188	80
	78	70			Dex
Station 32	358	33			Rev				20	89
	15	22			Rev				345	84
	357	24	86	24	Rev
	178	29			Rev

## Sheet: SA1
Saleve	Mode-II		Slickenside			Hybrid/Mode-III			Stylolite
Station	Strike (RHR)	Dip	Trend	Plunge	Sense of Shear	Strike (RHR)	Dip	Sense of Shear	Strike (RHR)	Dip
Station 34	209	20	302	14	Rev				20	90
	28	19			Rev				47	78
	215	21			Rev				35	90
	200	23			Rev
	63	0	153	0	Rev
