# Supplementary material for: A fracture rarely comes alone: associations of fractures and stylolites in analogue outcrops improve borehole image interpretations of fractured carbonate geothermal reservoirs
Source: Copernicus journal article supplement (doi:10.5194/se-17-113-2026), 2026-01-21
Supplement: Supplementary file [file se-17-113-2026-supplement-title-page.pdf › se-17-113-2026-supplement-title-page.pdf]

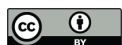

## *Supplement of*

# **A fracture rarely comes alone: associations of fractures and stylolites in analogue outcrops improve borehole image interpretations of fractured carbonate geothermal reservoirs**

**Jasper Hupkes et al.**

*Correspondence to:* Jasper Hupkes ([j.hupkes@tudelft.nl](mailto:j.hupkes@tudelft.nl))

- [se-17-113-2026-supplement-title-page.pdf](#)
- [fig08\\_fig09\\_stereonets.xlsx](#)

The copyright of individual parts of the supplement might differ from the article licence.
